# Supplementary material for: Ring-opening polymerization of β-thiobutyrolactone catalyzed by phosphazenes
Source: Royal Society of Chemistry journal article supplement (doi:10.1039/d3py00707c), 2023-01-01
Supplement: d3py00707c1.pdf [file d3py00707c1.pdf]

## Supporting Information

for

### Ring-Opening Polymerization of $\beta$ -Thiobutyrolactone Catalyzed by Phosphazenes

Hui Li, Sophie M. Guillaume,\* Jean-François Carpentier\*

#### Table of Contents

**Figure S1.**  $^1\text{H}$  NMR spectrum (500 MHz,  $\text{CDCl}_3$ , 25 °C) of a P3TB prepared with BEMP in bulk conditions (Table 1, entry 1) and proposed possible topologies of P3TB macromolecules formed.

**Figure S2.**  $^1\text{H}$  NMR spectrum (500 MHz,  $\text{CDCl}_3$ , 25 °C) of a P3TB prepared with *t*Bu-P<sub>1</sub> in toluene (Table 1, entry 3).

**Figure S3.**  $^1\text{H}$  NMR spectrum (500 MHz,  $\text{CDCl}_3$ , 25 °C) of a P3TB prepared with *t*Bu-P<sub>2</sub> in toluene (Table 1, entry 4).

**Figure S4.**  $^1\text{H}$  NMR spectrum (500 MHz,  $\text{CDCl}_3$ , 25 °C) of a P3TB prepared with *t*Bu-P<sub>4</sub> in toluene (Table 1, entry 5).

**Figure S5.**  $^1\text{H}$  NMR spectrum (500 MHz,  $\text{CDCl}_3$ , 25 °C) of a P3TB prepared with *t*Bu-P<sub>4</sub> in THF (Table 1, entry 7).

**Figure S6.**  $^1\text{H}$  NMR spectrum (500 MHz,  $\text{CDCl}_3$ , 25 °C) of a P3TB prepared with *t*Bu-P<sub>4</sub> in THF in the presence of BnOH (Table 1, entry 11).

**Figure S7.**  $^1\text{H}$  NMR spectrum (500 MHz,  $\text{CDCl}_3$ , 25 °C) of a P3TB prepared with *t*Bu-P<sub>4</sub> in THF in the presence of BnOH (Table 1, entry 12).

**Figure S8.**  $^1\text{H}$  NMR spectrum (500 MHz,  $\text{CDCl}_3$ , 25 °C) of a P3TB prepared with *t*Bu-P<sub>4</sub> in THF in the presence of BnOH (Table 1, entry 13).

**Figure S9.**  $^1\text{H}$  NMR spectrum (500 MHz,  $\text{CDCl}_3$ , 25 °C) of a P3TB prepared with *t*Bu-P<sub>4</sub> in toluene in the presence of BnSH (Table 1, entry 14).

**Figure S10.**  $^1\text{H}$  NMR spectrum (500 MHz,  $\text{CDCl}_3$ , 25 °C) of a P3TB prepared with *t*Bu-P<sub>4</sub> in toluene in the presence of BnSH (Table 1, entry 15).

**Figure S11.**  $^1\text{H}$  NMR spectrum (500 MHz,  $\text{CDCl}_3$ , 25 °C) of a P3TB prepared with *t*Bu-P<sub>4</sub> in THF in the presence of BnSH (Table 1, entry 16).

**Figure S12.**  $^1\text{H}$  NMR spectrum (500 MHz,  $\text{CDCl}_3$ , 25 °C) of a P3TB prepared with *t*Bu-P<sub>4</sub> in THF in the presence of BnSH (Table 1, entry 16 duplicated).

**Figure S13–S27.** Representative SEC traces of isolated P3TBs.

**Figure S28.**  $^{31}\text{P}\{^1\text{H}\}$  NMR spectra (202 MHz,  $\text{C}_6\text{D}_6$ , 25 °C) of: (a) 1:1 (*mol/mol*) mixture of *t*Bu-P<sub>4</sub> and *rac*-TBL; (b) 1:1 (*mol/mol*) mixture of *t*Bu-P<sub>4</sub> and benzoic acid; (c) *t*Bu-P<sub>4</sub>.

**Figure S29.**  $^1\text{H}$  NMR spectrum (500 MHz,  $\text{C}_6\text{D}_6$ , 25 °C) of 1:1 (*mol/mol*) mixture of *t*Bu-P<sub>4</sub> and *rac*-TBL.

**Figure S30.** MALDI-ToF mass spectrum of a P3TB prepared with *t*Bu-P<sub>1</sub> (Table 1, entry 3) recorded at very high laser power.

**Figure S31.** Details of the MALDI-ToF mass spectrum of a P3TB (Figure S30) prepared with *t*Bu-P<sub>1</sub> (Table 1, entry 3), including a major population of cyclic P3TB. The two less intense populations have not been identified yet.

**Figure S32.** ESI mass spectrum (positive mode, MeOH) of a P3TB prepared with *t*Bu-P<sub>4</sub> in THF (Table 1, entry 7).

**Figure S33.** Details of the ESI mass spectrum (positive mode, MeOH; Figure S32) of a P3TB prepared with *t*Bu-P<sub>4</sub> in THF (Table 1, entry 7), showing the major populations of macromolecular ions for a polymerization degree, *n*, of 8.

**Figure S34.** Details of the ESI mass spectrum (positive mode, MeOH; Figure S32) of a P3TB prepared with *t*Bu-P<sub>4</sub> in THF (Table 1, entry 7), showing the major populations of macromolecular ions for a polymerization degree, *n*, of 9.

**Figure S35.** TGA thermogram of a P3TB sample prepared by BEMP in toluene (Table 1, entry 2).

**Figure S36.** TGA thermogram of a P3TB sample prepared by *t*Bu-P<sub>1</sub> in toluene (Table 1, entry 3).

**Figure S37.** TGA thermogram of a P3TB sample prepared by *t*Bu-P<sub>4</sub> in THF (Table 1, entry 9).

**Figure S38.** TGA thermogram of a P3TB sample prepared by *t*Bu-P<sub>4</sub> in THF (Table 1, entry 10).

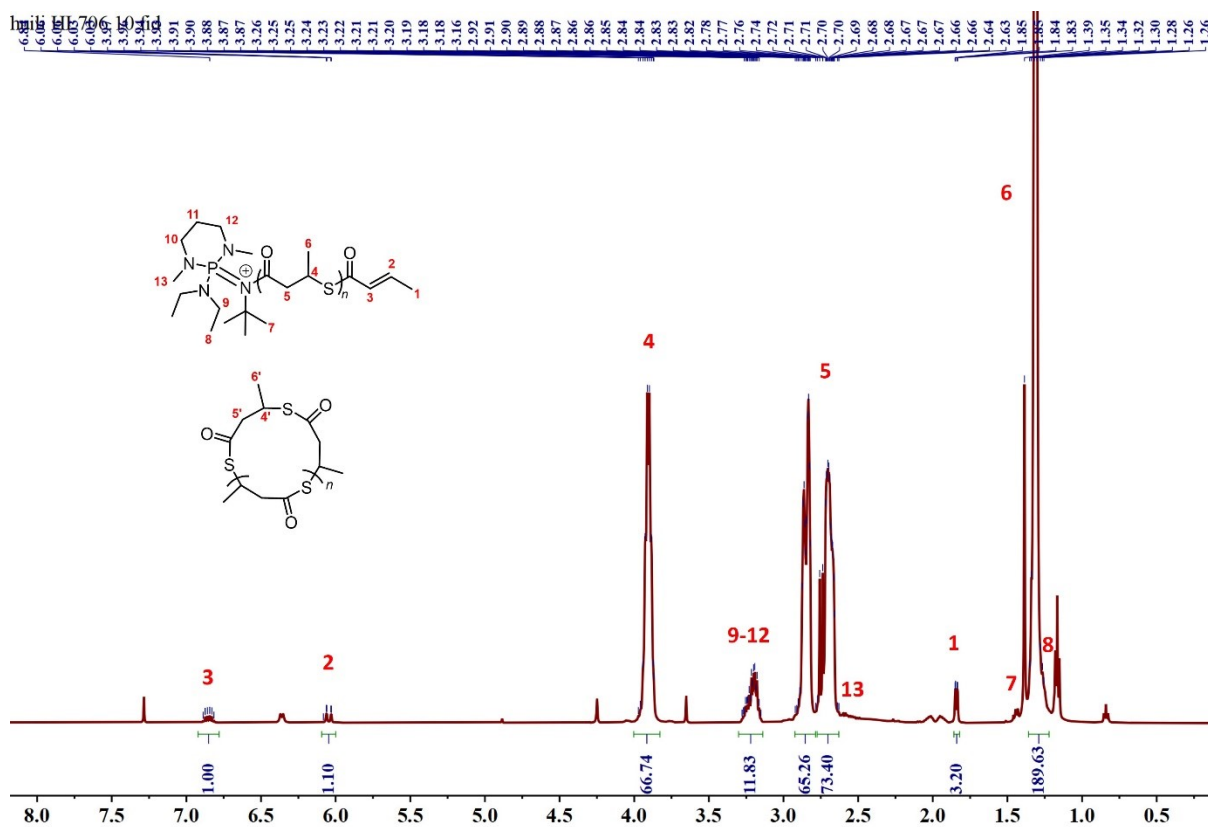

**Figure S1.**  $^1\text{H}$  NMR spectrum (500 MHz,  $\text{CDCl}_3$ , 25  $^\circ\text{C}$ ) of a P3TB prepared with BEMP in bulk conditions (Table 1, entry 1) and proposed possible topologies of P3TB macromolecules formed.

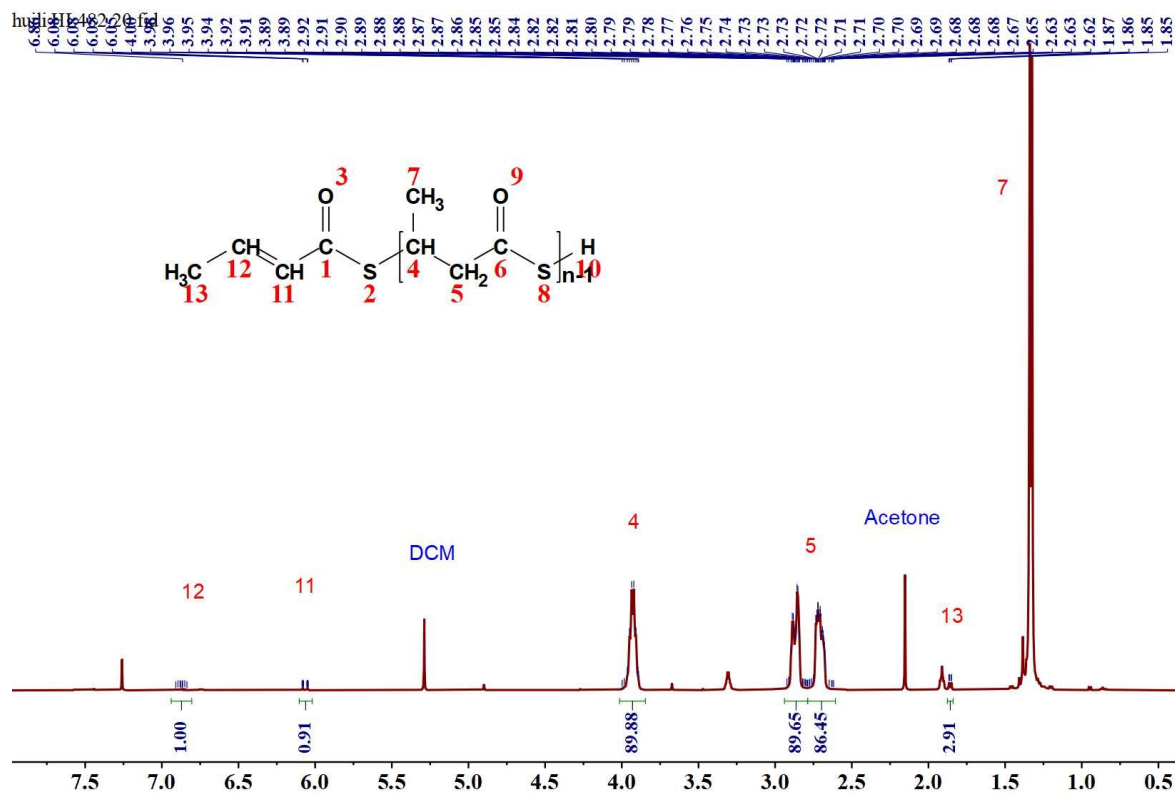

**Figure S2.**  $^1\text{H}$  NMR spectrum (500 MHz,  $\text{CDCl}_3$ , 25  $^\circ\text{C}$ ) of a P3TB prepared with *t*Bu- $\text{P}_1$  in toluene (Table 1, entry 3).

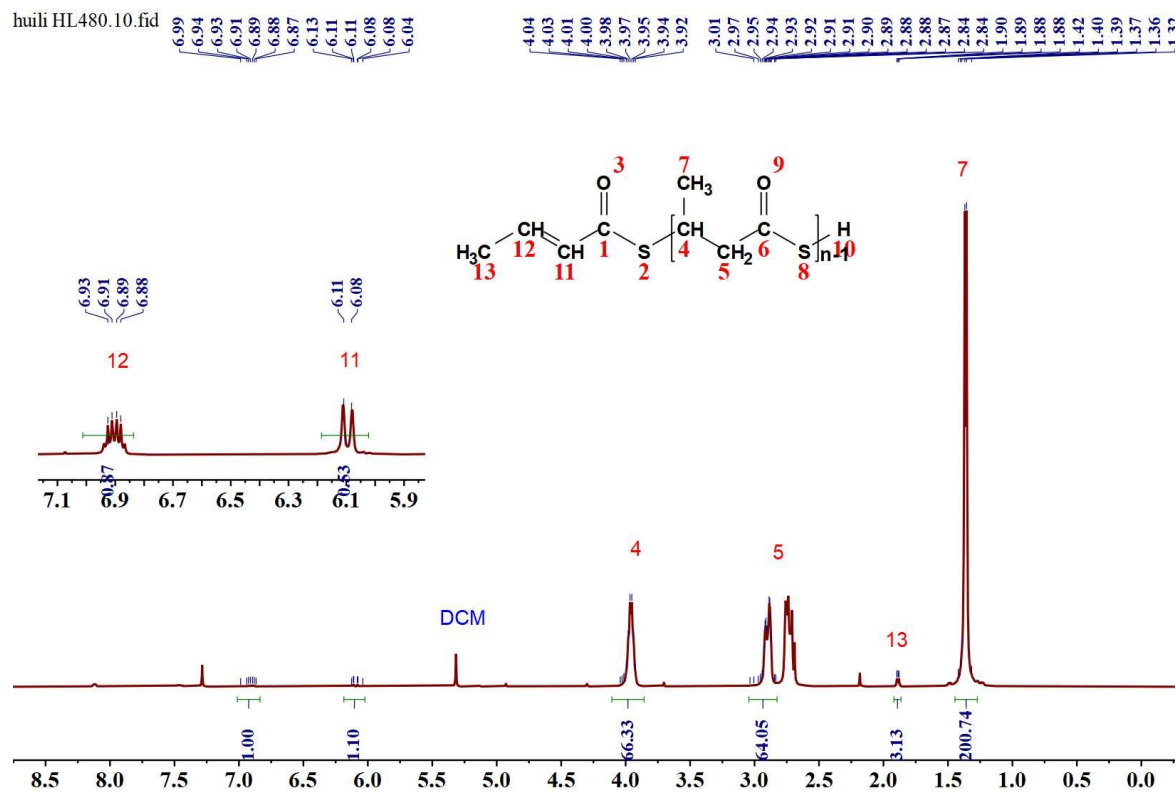

**Figure S3.**  $^1\text{H}$  NMR spectrum (500 MHz,  $\text{CDCl}_3$ , 25  $^\circ\text{C}$ ) of a P3TB prepared with *t*Bu- $\text{P}_2$  in toluene (Table 1, entry 4).

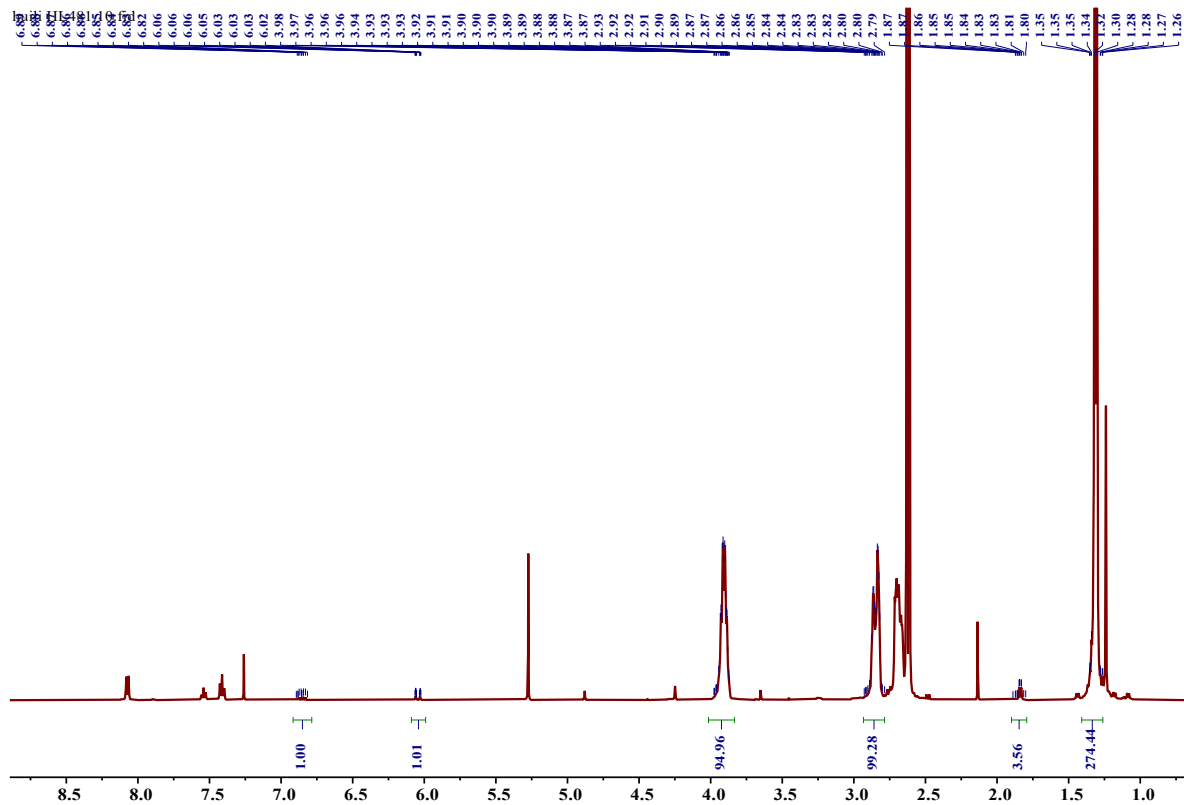

**Figure S4.**  $^1\text{H}$  NMR spectrum (500 MHz,  $\text{CDCl}_3$ , 25  $^\circ\text{C}$ ) of a P3TB prepared with *t*Bu- $\text{P}_4$  in toluene (Table 1, entry 5).

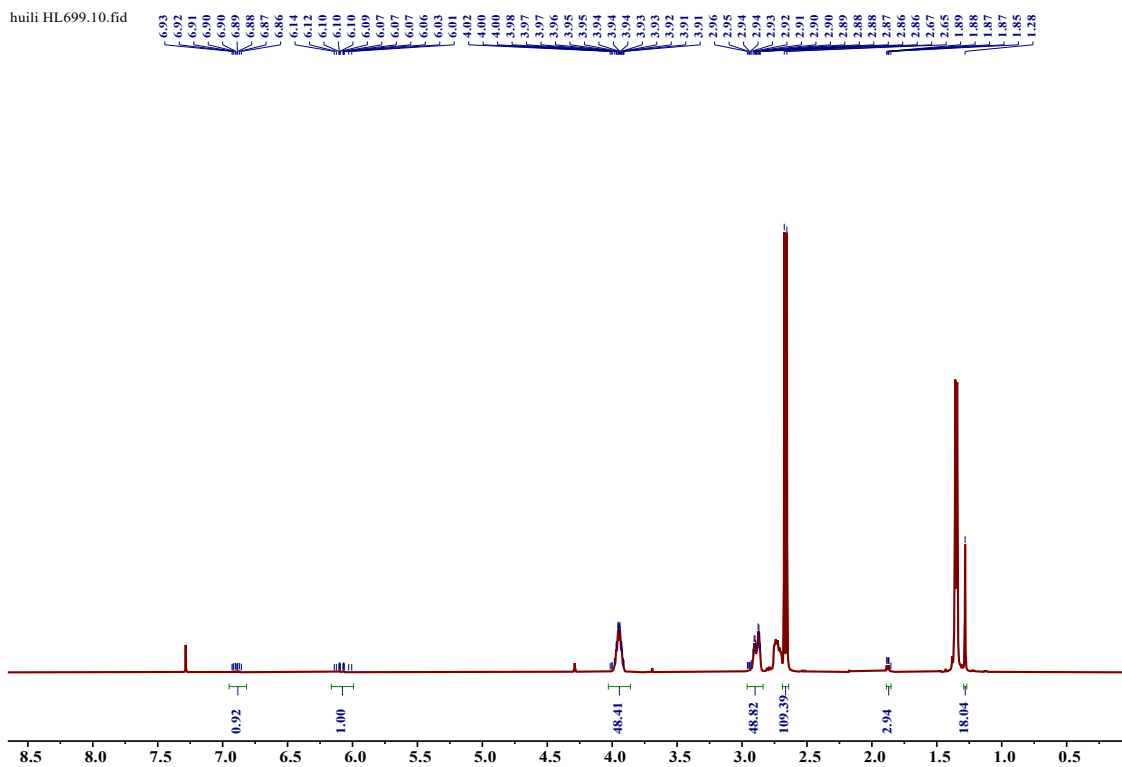

**Figure S5.**  $^1\text{H}$  NMR spectrum (500 MHz,  $\text{CDCl}_3$ , 25  $^\circ\text{C}$ ) of a P3TB prepared with *t*Bu- $\text{P}_4$  in THF (Table 1, entry 7).

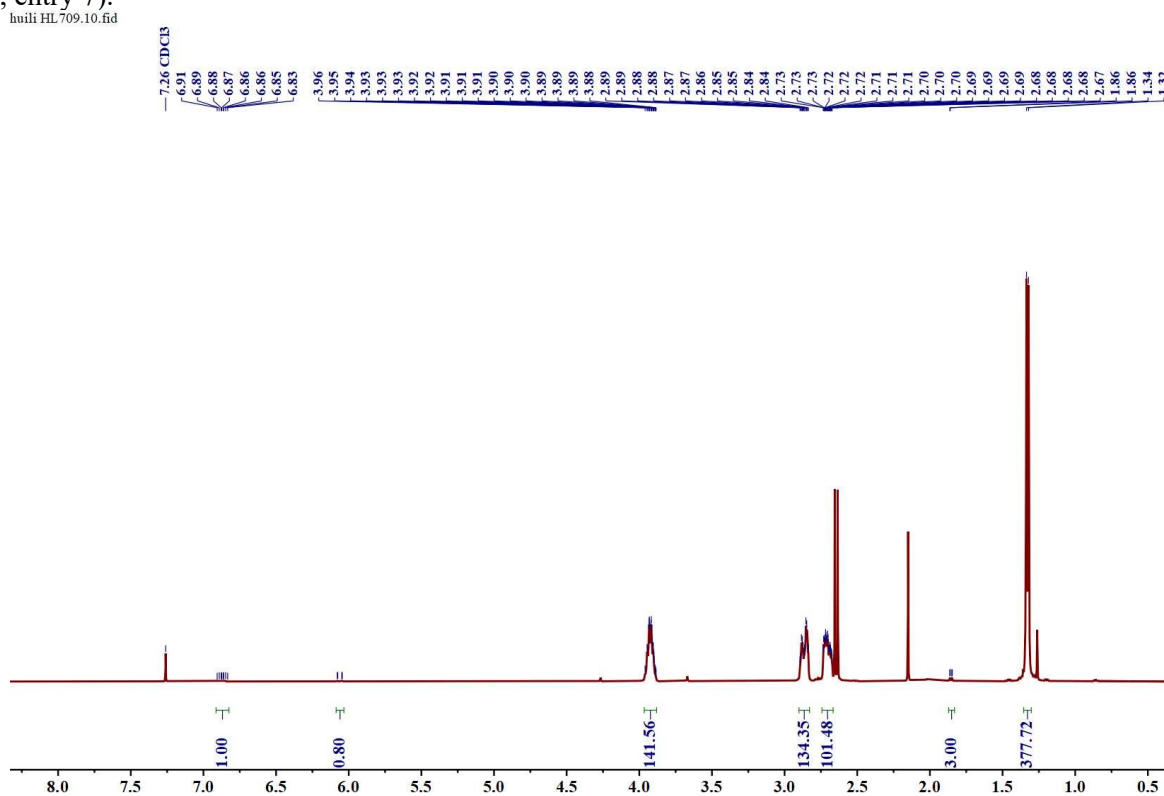

**Figure S6.**  $^1\text{H}$  NMR spectrum (500 MHz,  $\text{CDCl}_3$ , 25  $^\circ\text{C}$ ) of a P3TB prepared with *t*Bu- $\text{P}_4$  in THF in the presence of BnOH (Table 1, entry 11).

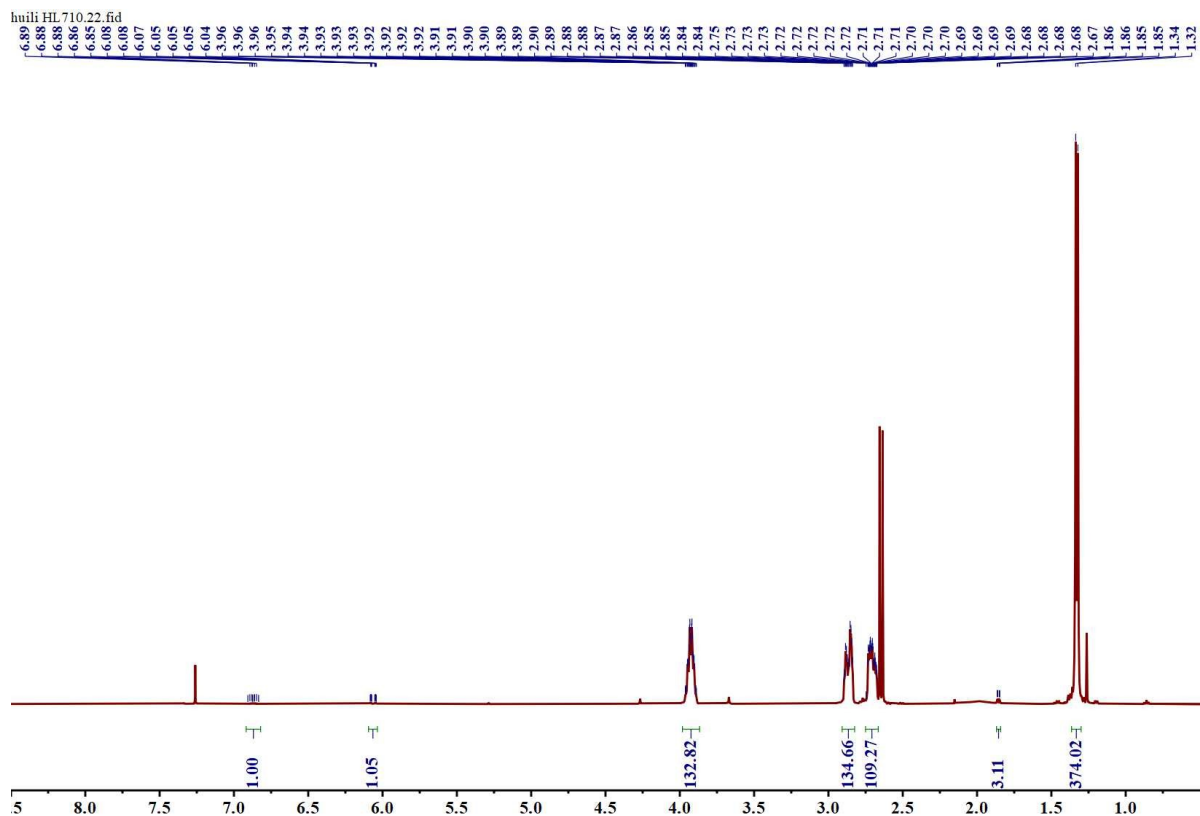

**Figure S7.** <sup>1</sup>H NMR spectrum (500 MHz, CDCl<sub>3</sub>, 25 °C) of a P3TB prepared with *t*Bu-P<sub>4</sub> in THF in the presence of BnOH (Table 1, entry 12).

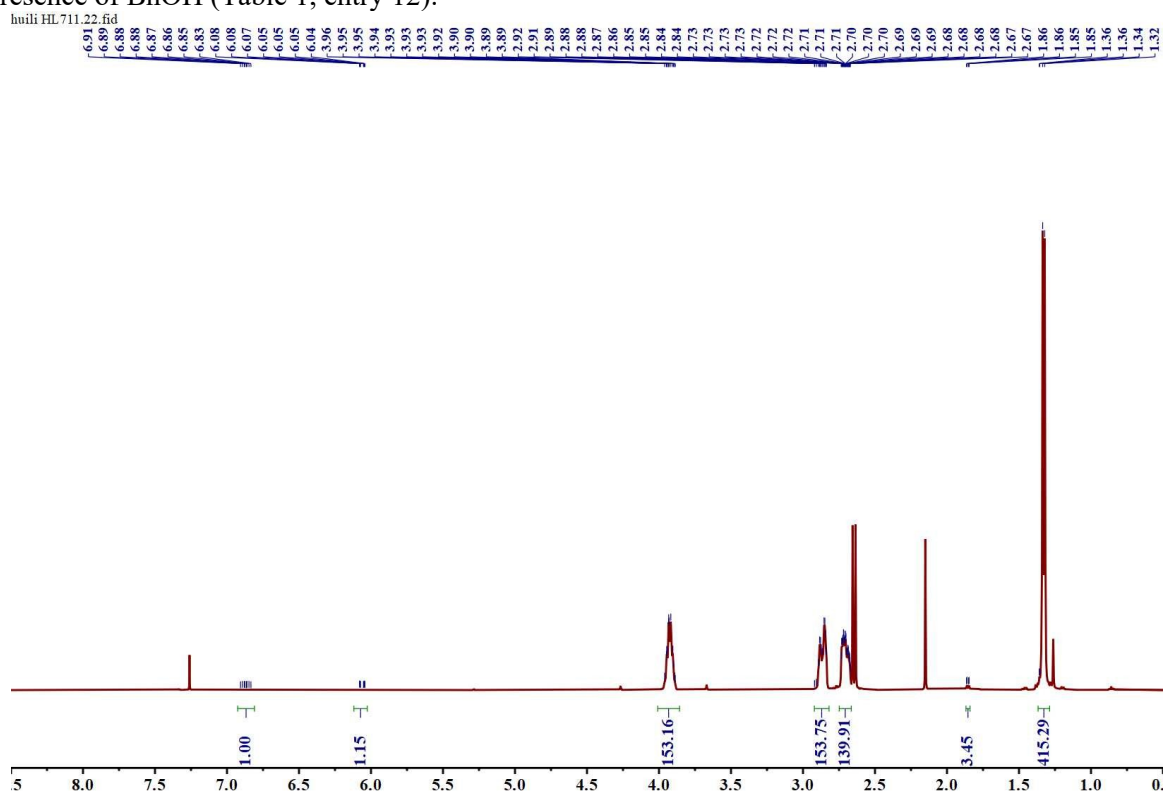

**Figure S8.** <sup>1</sup>H NMR spectrum (500 MHz, CDCl<sub>3</sub>, 25 °C) of a P3TB prepared with *t*Bu-P<sub>4</sub> in THF in the presence of BnOH (Table 1, entry 13).

huili HL514.10.fid

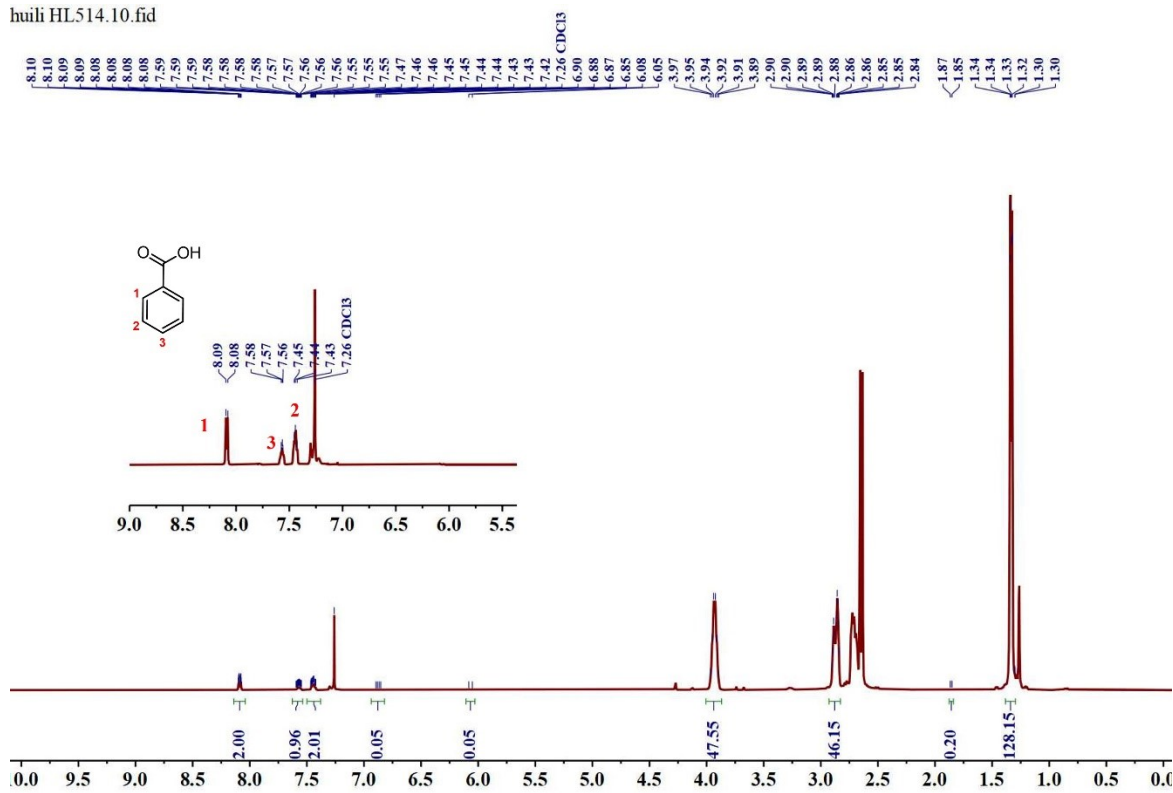

**Fig**

**ure S9.** <sup>1</sup>H NMR spectrum (500 MHz, CDCl<sub>3</sub>, 25 °C) of a P3TB prepared with *t*Bu-P<sub>4</sub> in toluene in the presence of BnSH (Table 1, entry 14). The low-field signals at  $\delta$  ca. 7.45, 7.65 and 8.15 ppm arise from residual benzoic acid used for quenching (as a 5wt% CHCl<sub>3</sub> solution).

huili HL450.10.fid

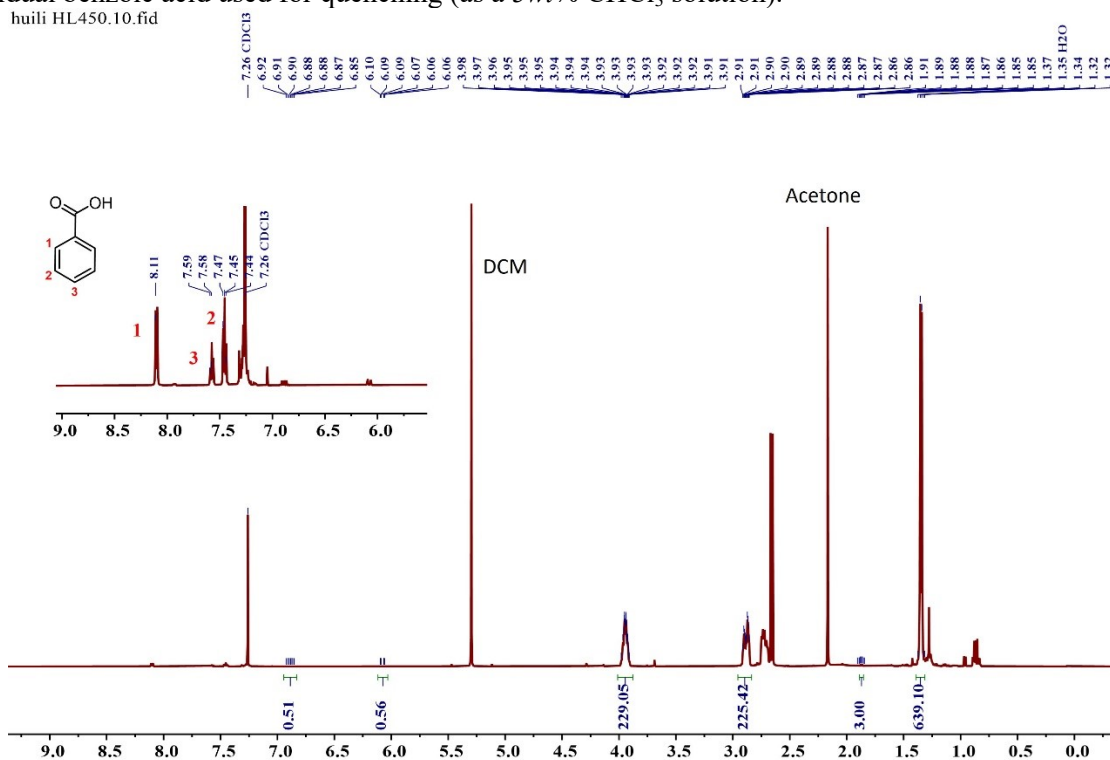

**Figure S10.** <sup>1</sup>H NMR spectrum (500 MHz, CDCl<sub>3</sub>, 25 °C) of a P3TB prepared with *t*Bu-P<sub>4</sub> in toluene in the presence of BnSH (Table 1, entry 15). The low-intensity, low-field signals at  $\delta$  ca. 7.45, 7.65 and 8.15 ppm arise from residual benzoic acid used for quenching (as a 5wt% CHCl<sub>3</sub> solution).

huili HL719.10.fid

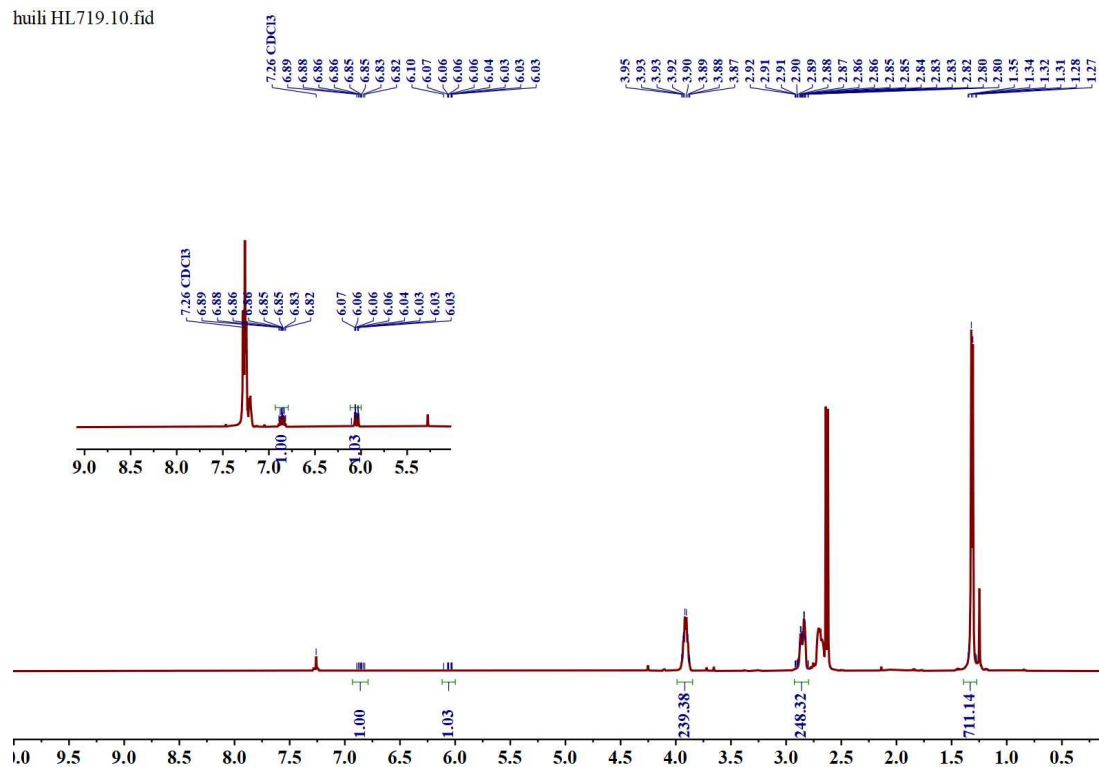

**Figure S11.** <sup>1</sup>H NMR spectrum (500 MHz, CDCl<sub>3</sub>, 25 °C) of a P3TB prepared with *t*Bu-P<sub>4</sub> in THF in the presence of BnSH (Table 1, entry 16); the reaction was quenched with “wet” commercial-grade *n*-hexane.

huili HL702.10.fid

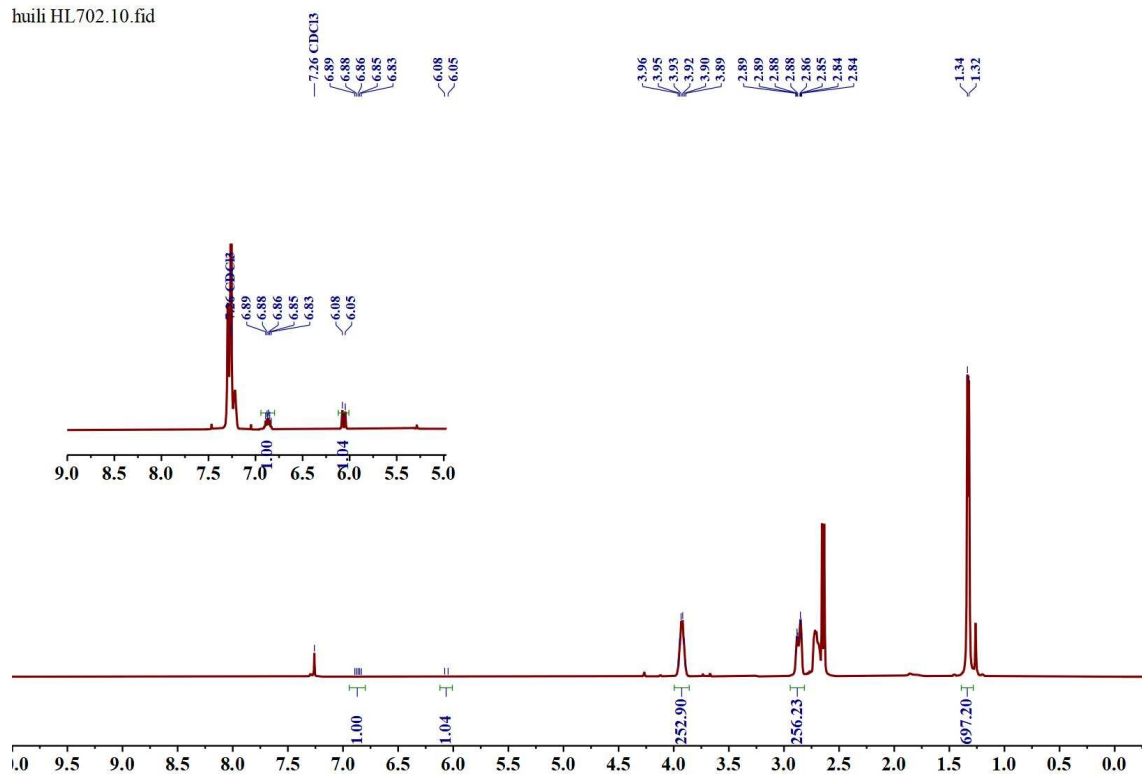



**Figure S12.**  $^1\text{H}$  NMR spectrum (500 MHz,  $\text{CDCl}_3$ , 25 °C) of a P3TB prepared with  $t\text{Bu-P}_4$  in THF in the presence of BnSH (Table 1, entry 16 duplicated); the reaction was quenched with “wet” commercial-grade  $n$ -hexane.

### Representative SEC traces of P3TBs

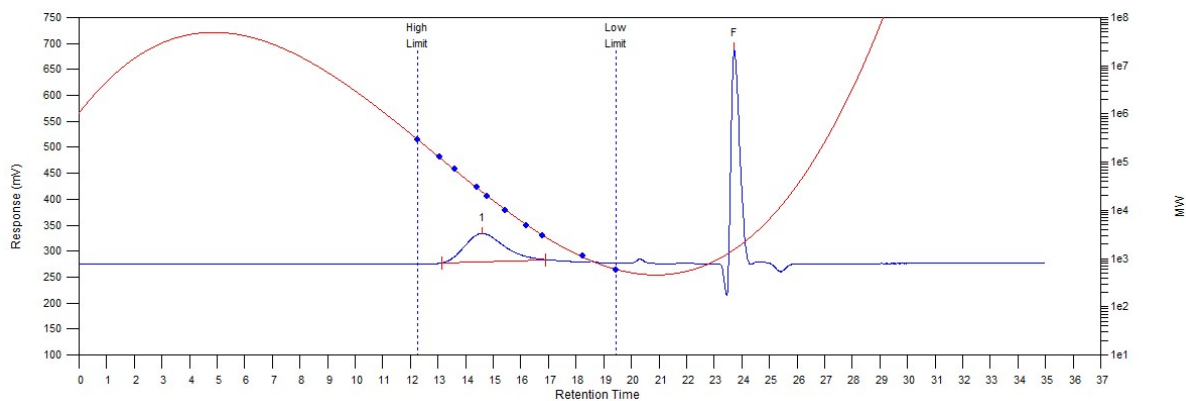

**Figure S13.** SEC trace of an isolated P3TB (Table 1, entry 1).

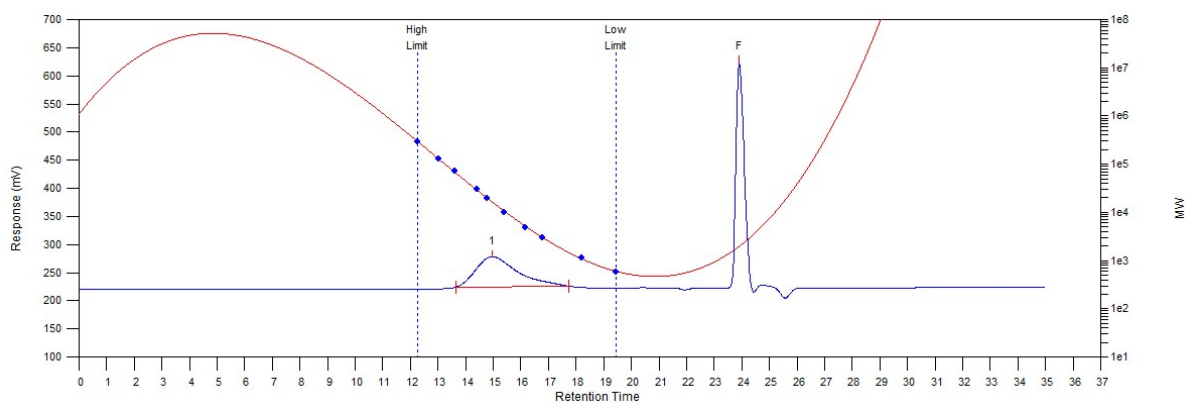

**Figure S14.** SEC trace of an isolated P3TB (Table 1, entry 3).

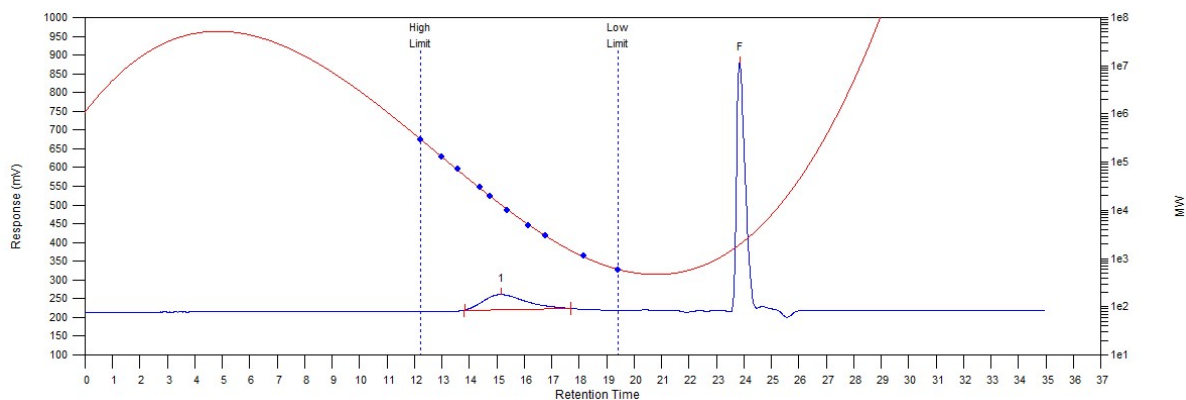

**Figure S15.** SEC trace of an isolated P3TB (Table 1, entry 5).

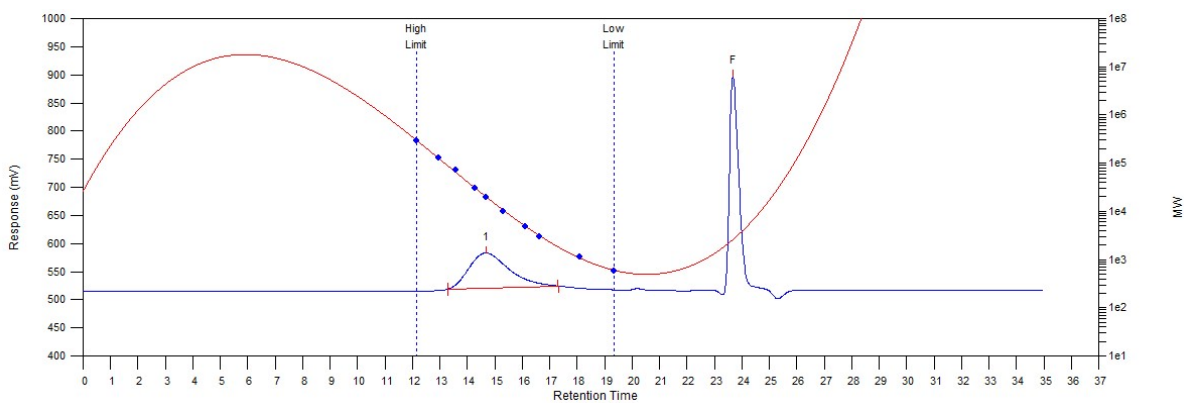

**Figure S16.** SEC trace of an isolated P3TB (Table 1, entry 6).

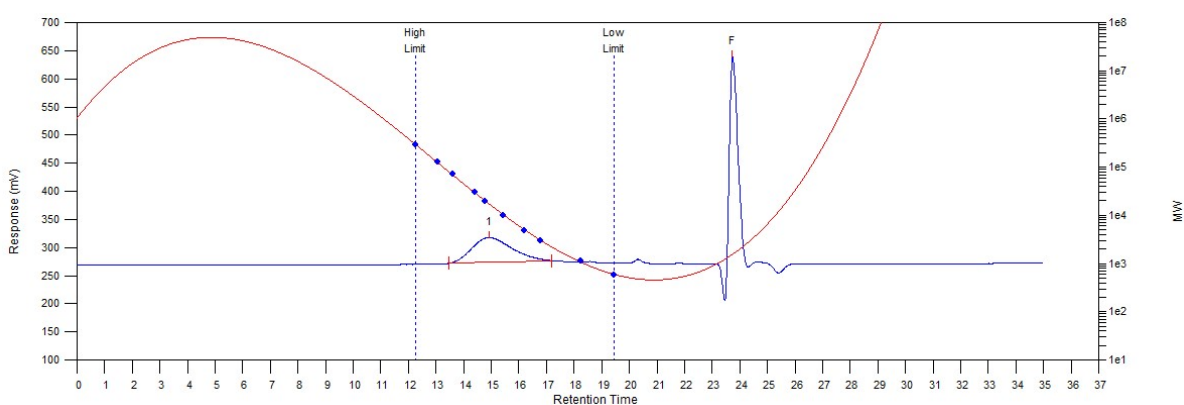

**Figure S17.** SEC trace of an isolated P3TB (Table 1, entry 7).

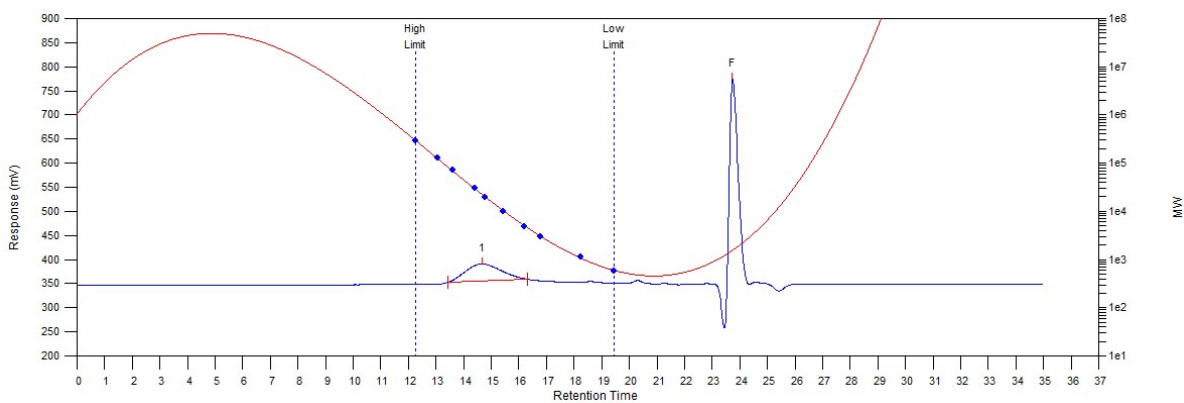

**Figure S18.** SEC trace of an isolated P3TB (Table 1, entry 8).

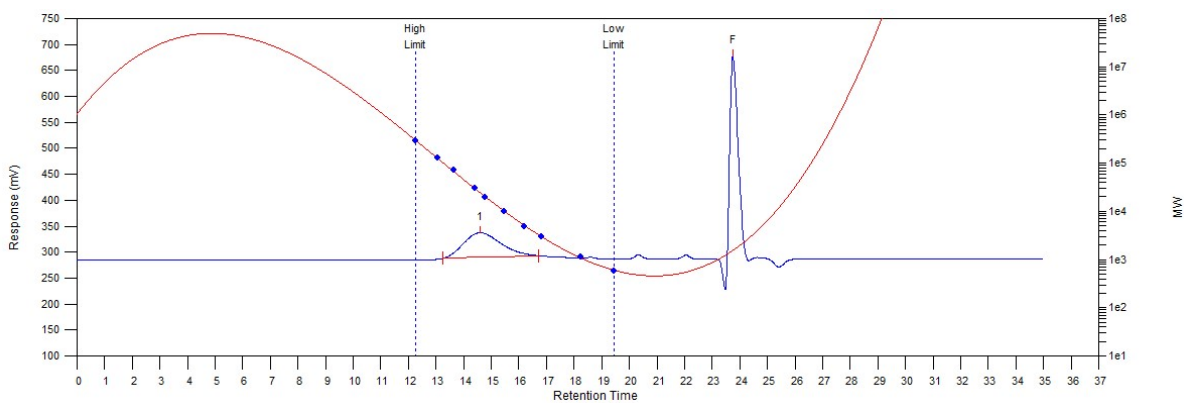

**Figure S19.** SEC trace of an isolated P3TB (Table 1, entry 9).

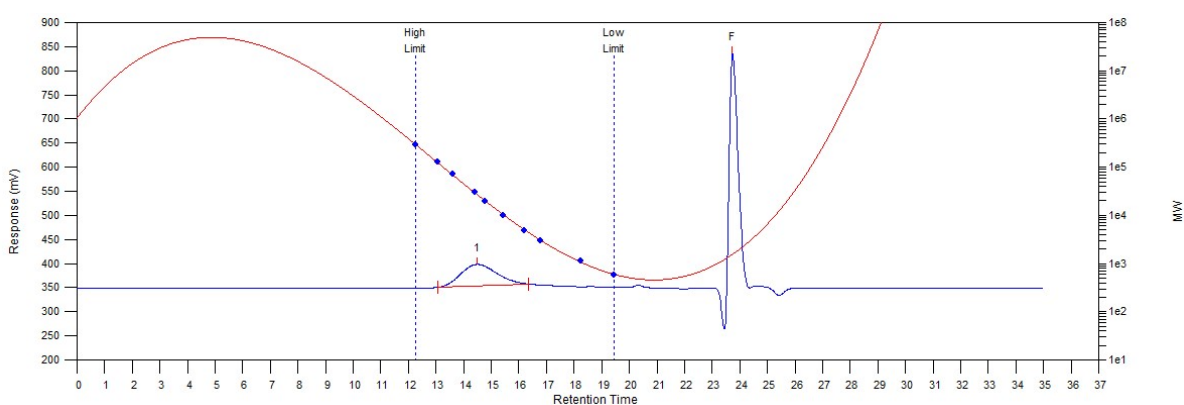

**Figure S20.** SEC trace of an isolated P3TB (Table 1, entry 10).

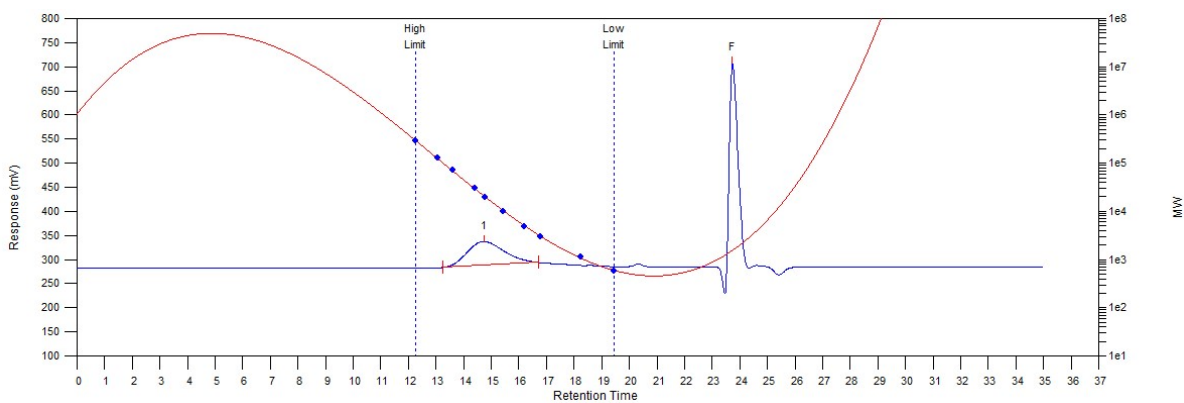

**Figure S21.** SEC trace of an isolated P3TB (Table 1, entry 11).

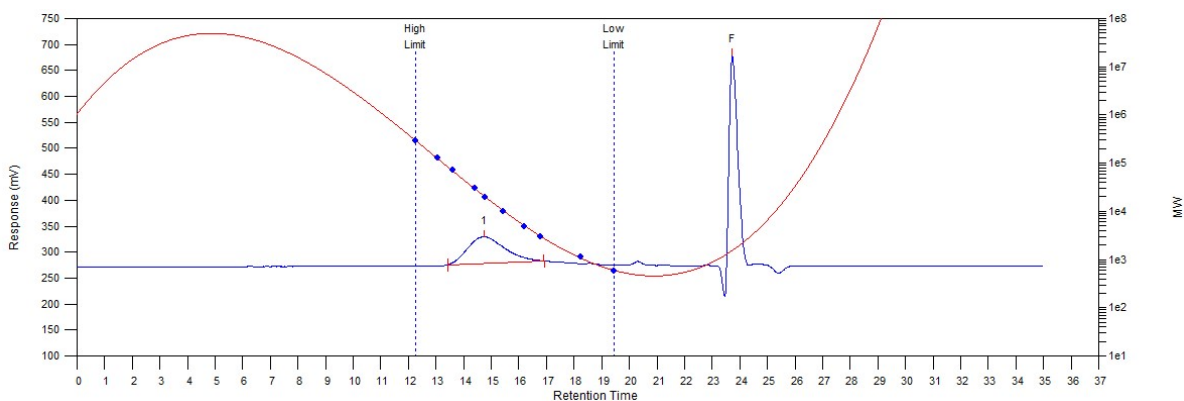

**Figure S22.** SEC trace of an isolated P3TB (Table 1, entry 12).

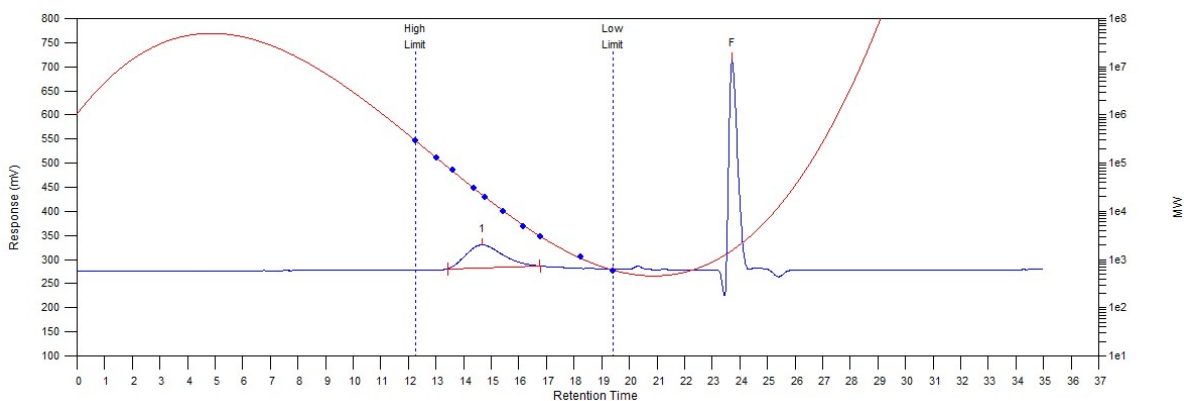

**Figure S23.** SEC trace of an isolated P3TB (Table 1, entry 13).

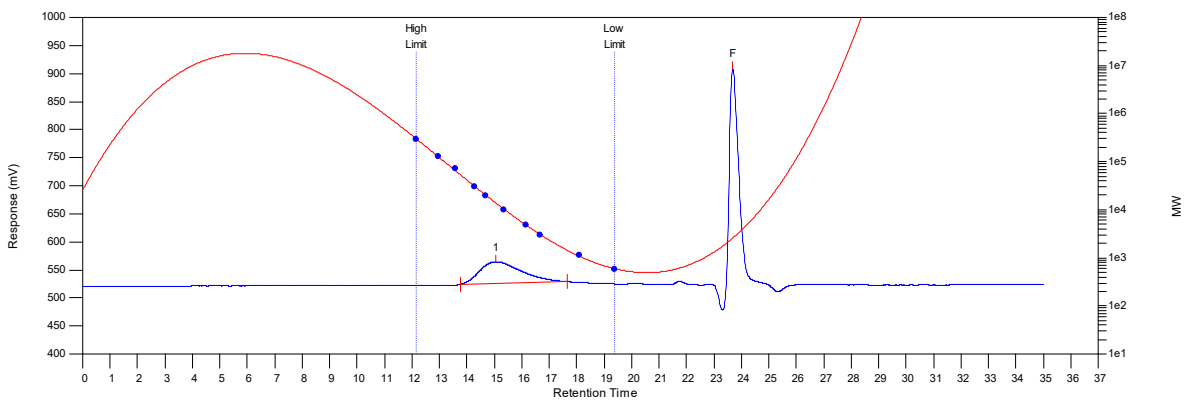

**Figure S24.** SEC trace of an isolated P3TB (Table 1, entry 14).

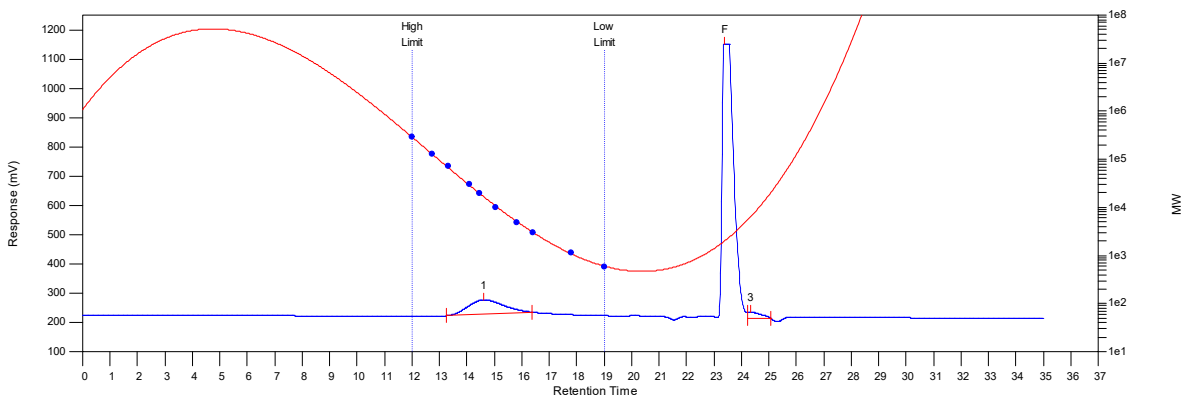

**Figure S25.** SEC trace of an isolated P3TB (Table 1, entry 15).

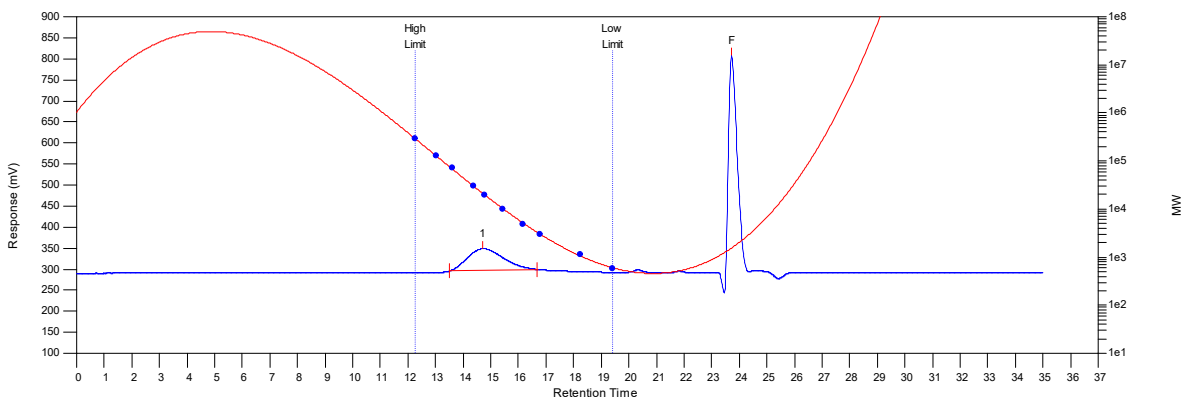

**Figure S26.** SEC trace of an isolated P3TB (Table 1, entry HL16).

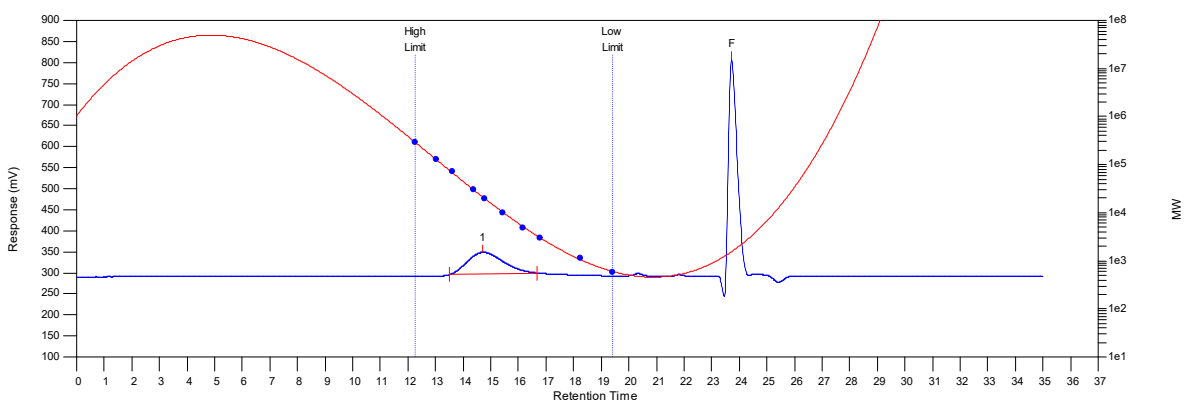

**Figure S27.** SEC trace of an isolated P3TB (repetition of Table 1, entry 16).

huili HL-(P4+TBL).15.fid

(a)

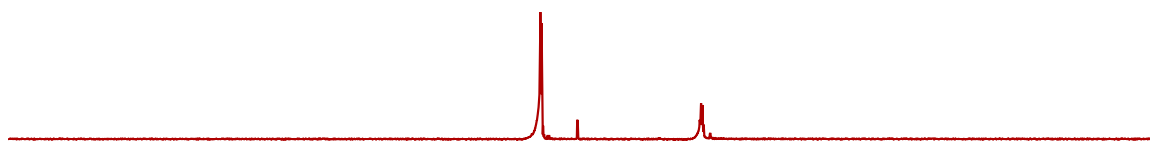

huili HL-tBup4+PhCO2H.12.fid

(b)

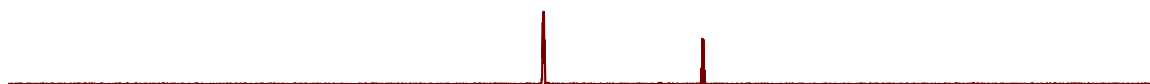

huili HL-P4.12.fid

(c)

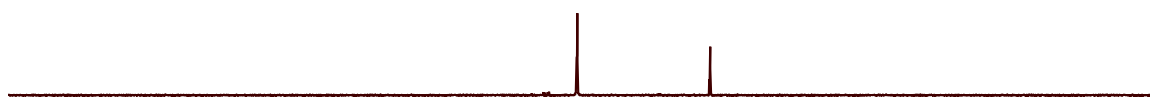

130 120 110 100 90 80 70 60 50 40 30 20 10 0 -10 -20 -30 -40 -50 -60 -70 -80 -90 -100 -110 -120

**Figure S28.**  $^{31}\text{P}\{^1\text{H}\}$  NMR spectra (202 MHz,  $\text{C}_6\text{D}_6$ , 25 °C) of: (a) 1:1 (*mol/mol*) mixture of *t*Bu- $\text{P}_4$  and *rac*-TBL; (b) 1:1 (*mol/mol*) mixture of *t*Bu- $\text{P}_4$  and benzoic acid; (c) native *t*Bu- $\text{P}_4$ .

huili HL-(P4+TBL).10.fid

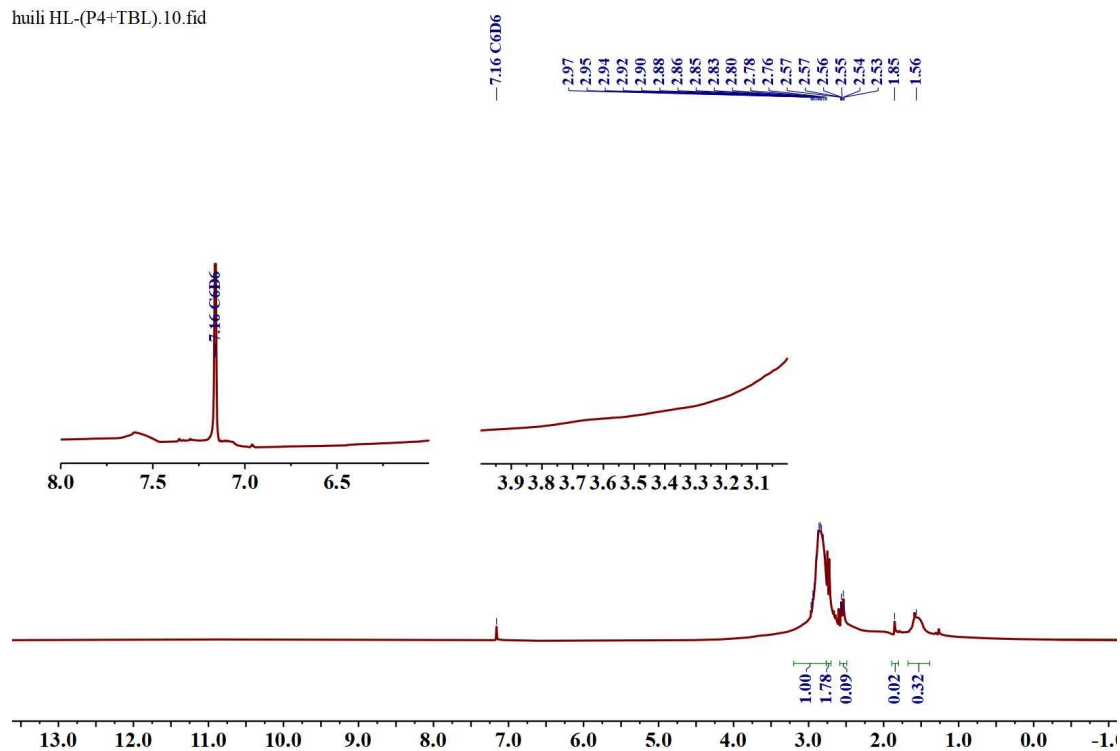

**Figure S29.**  $^1\text{H}$  NMR spectrum (500 MHz,  $\text{C}_6\text{D}_6$ , 25 °C) of 1:1 (*mol/mol*) mixture of *t*Bu- $\text{P}_4$  and *rac*-TBL.

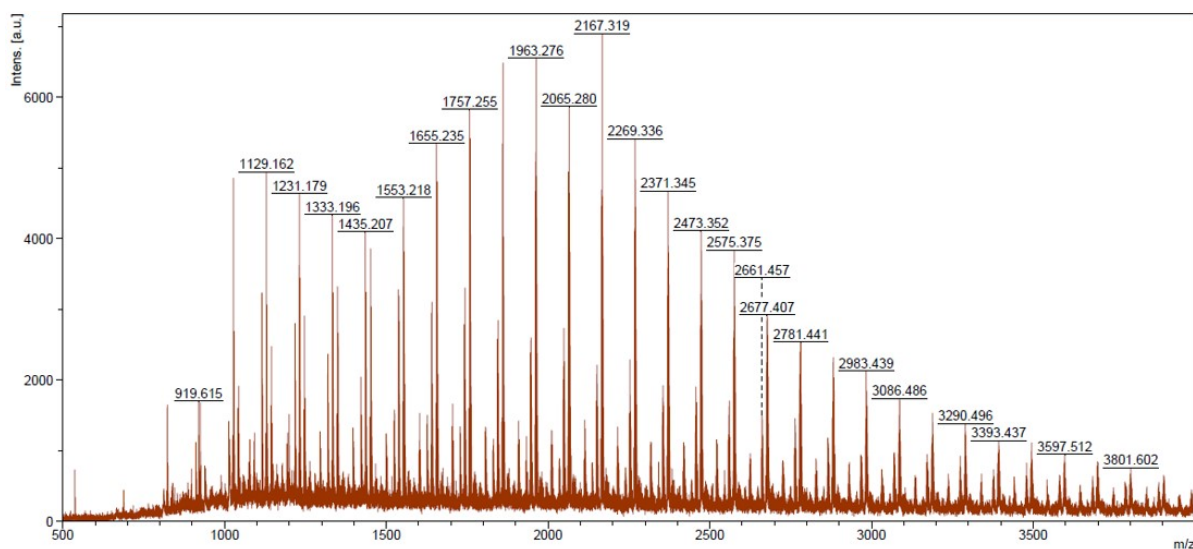

**Figure S30.** MALDI-ToF mass spectrum of a P3TB prepared with *t*Bu-P<sub>1</sub> in toluene (Table 1, entry 3) recorded at very high laser power.

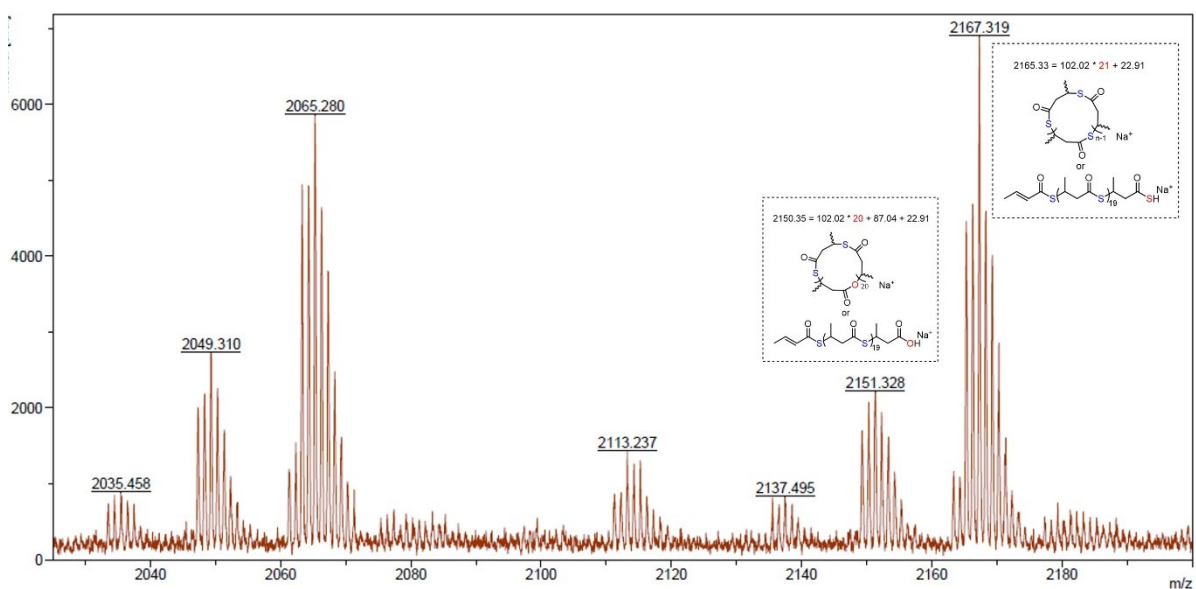

**Figure S31.** Details of the MALDI-ToF mass spectrum (Figure S30) of a P3TB prepared with *t*Bu-P<sub>1</sub> in toluene (Table 1, entry 3), including a major population of cyclic P3TB. The two less intense populations have not been identified yet.

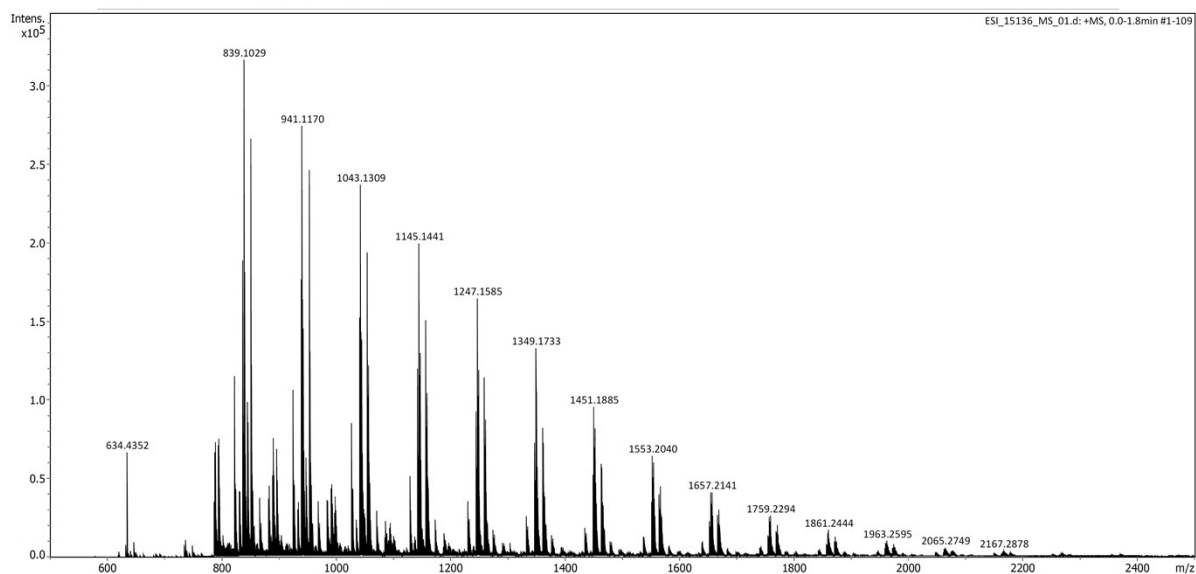

**Figure S32.** ESI mass spectrum (positive mode, MeOH) of a P3TB prepared with *t*Bu-P<sub>4</sub> in THF (Table 1, entry 7) (intensity of the signals above *m/z* = 880 has been enhanced). The most intense series (with peak picking values) corresponds to  $\{\text{CH}_3\text{CH}=\text{CHC}(\text{O})\text{S}[\text{C}_4\text{H}_6\text{OS}]_{n-1}\text{H}+\text{Na}\}^+$  or  $\{[\text{C}_4\text{H}_6\text{OS}]_n+\text{Na}\}^+$  with, for *n* = 8, *m/z* exp = 839.1029 vs. *m/z* theo = 839.1012; for *n* = 9, *m/z* exp = 941.1170 vs. *m/z* theo = 941.1152; for *n* = 10, *m/z* exp = 1043.1309 vs. *m/z* theo = 1043.1291; for *n* = 11, *m/z* exp = 1145.1441 vs. *m/z* theo = 1145.1431; for *n* = 12, *m/z* exp = 1247.1585 vs. *m/z* theo = 1247.1570.

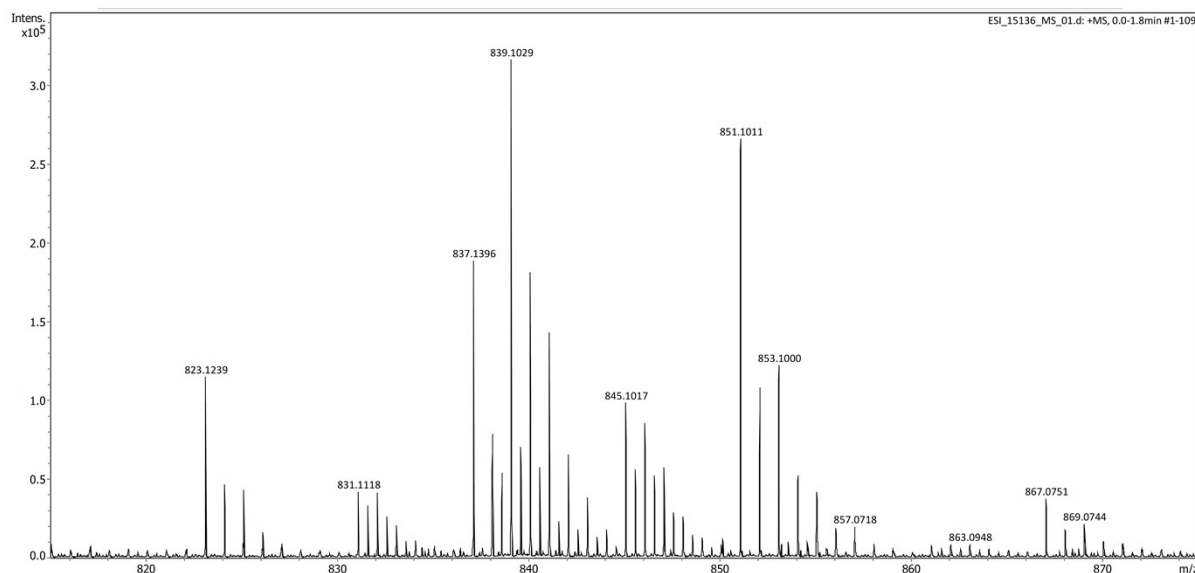

**Figure S33.** Details of the ESI mass spectrum (positive mode, MeOH; Figure S32) of a P3TB prepared with *t*Bu-P<sub>4</sub> in THF (Table 1, entry 7), showing the major populations of macromolecular ions for a polymerization degree, *n*, of 8. For  $\{\text{CH}_3\text{CH}=\text{CHC}(\text{O})\text{S}[\text{C}_4\text{H}_6\text{OS}]_7\text{H}+\text{Na}\}^+$  or  $\{[\text{C}_4\text{H}_6\text{OS}]_8+\text{Na}\}^+$  *m/z* exp = 839.1029 vs. *m/z* theo = 839.1012; for  $\{[\text{CH}_3\text{CH}=\text{CHCOS}][\text{C}_4\text{H}_6\text{OS}]_6[\text{CH}(\text{CH}_3)\text{CH}_2\text{COOH}]+\text{Na}\}^+$  *m/z* exp = 823.1239 vs. *m/z* theo = 823.1235; for  $\{[\text{CH}_3\text{CH}=\text{CHCOS}][\text{C}_4\text{H}_6\text{OS}]_6[\text{CH}(\text{CH}_3)\text{CH}_2\text{CO}_2\text{CH}_3]+\text{Na}\}^+$  *m/z* exp = 837.1396 vs. *m/z* theo = 837.1397; the macromolecular ion at *m/z* = 851.1011 could not be identified.



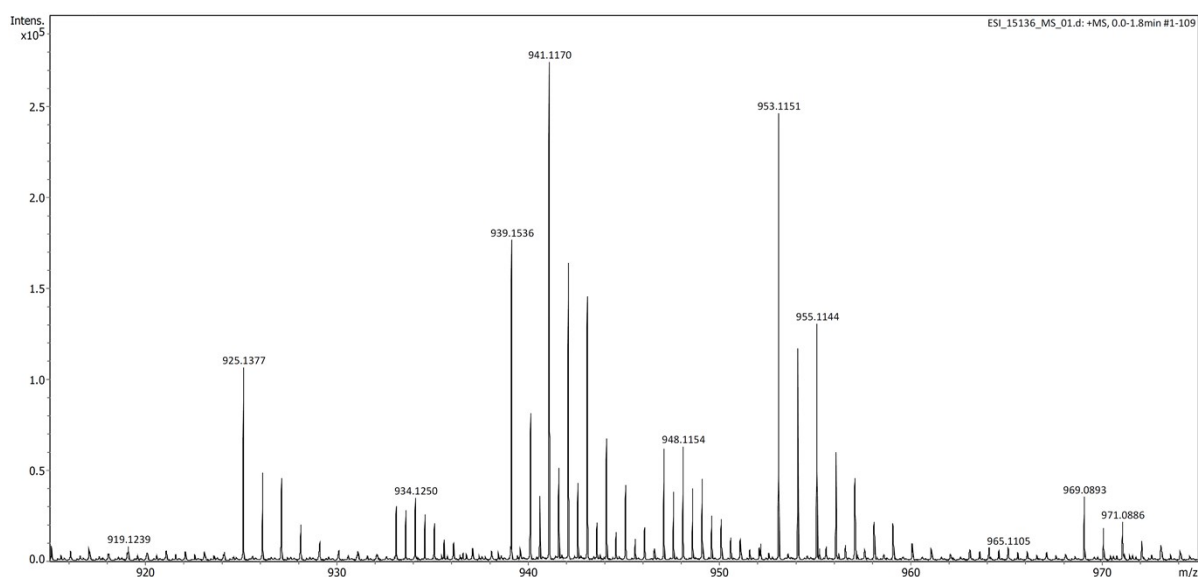

**Figure S34.** Details of the ESI mass spectrum (positive mode, MeOH; Figure S32) of a P3TB prepared with *t*Bu-P<sub>4</sub> in THF (Table 1, entry 7), showing the major populations of macromolecular ions for a polymerization degree, *n*, of 9. For  $\{\text{CH}_3\text{CH}=\text{CHC}(\text{O})\text{S}[\text{C}_4\text{H}_6\text{OS}]_8\text{H}+\text{Na}\}^+$  or  $\{[\text{C}_4\text{H}_6\text{OS}]_9+\text{Na}\}^+$   $m/z$  exp = 941.1170 vs.  $m/z$  theo = 941.1152; for  $\{[\text{CH}_3\text{CH}=\text{CHCOS}][\text{C}_4\text{H}_6\text{OS}]_7[\text{CH}(\text{CH}_3)\text{CH}_2\text{COOH}]+\text{Na}\}^+$   $m/z$  exp = 925.1377 vs.  $m/z$  theo = 925.1375; for  $\{[\text{CH}_3\text{CH}=\text{CHCOS}][\text{C}_4\text{H}_6\text{OS}]_7[\text{CH}(\text{CH}_3)\text{CH}_2\text{CO}_2\text{CH}_3]+\text{Na}\}^+$   $m/z$  exp = 939.1536 vs.  $m/z$  theo = 939.1537; the macromolecular ion at  $m/z = 953.1151$  could not be identified.

## Thermal studies

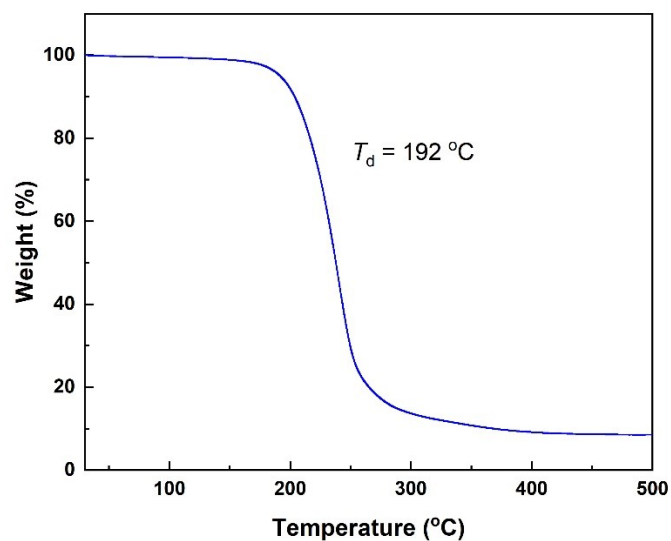

**Figure S35.** TGA thermogram of a P3TB sample prepared by BEMP in toluene (Table 1, entry 2;  $T_d$  defined as the temperature for 5% weight loss; polymer sample was heated from ambient temperature to 500 °C at a rate of 10 °C min<sup>-1</sup>).

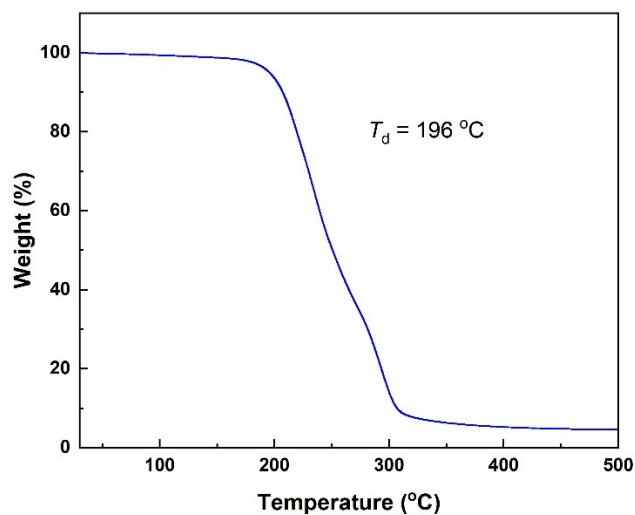

**Figure S36.** TGA thermogram of a P3TB sample prepared by *t*Bu-P<sub>1</sub> in toluene (Table 1, entry 3;  $T_d$  defined as the temperature for 5% weight loss; polymer sample was heated from ambient temperature to 500 °C at a rate of 10 °C min<sup>-1</sup>).

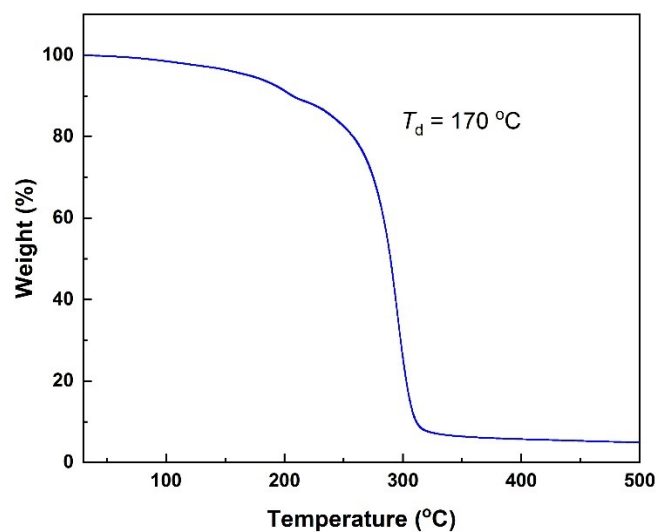

**Figure S37.** TGA thermogram of a P3TB sample prepared by *t*Bu-P<sub>4</sub> in THF (Table 1, entry 9;  $T_d$  defined as the temperature for 5% weight loss; polymer sample was heated from ambient temperature to 500 °C at a rate of 10 °C min<sup>-1</sup>).

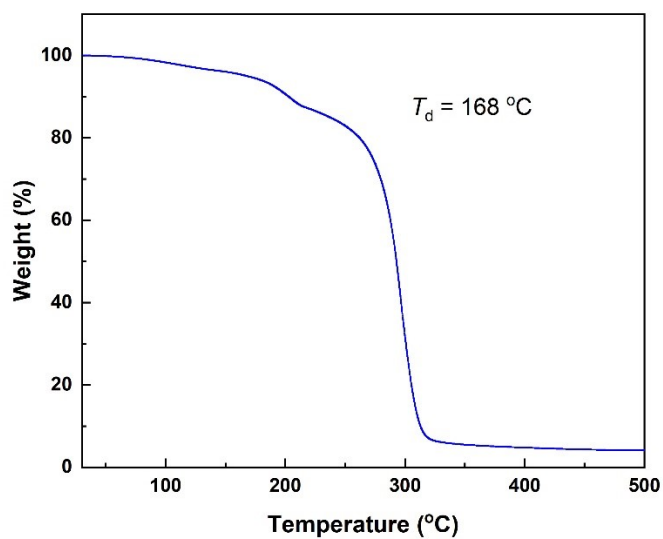

**Figure S38.** TGA thermogram of a P3TB sample prepared by *t*Bu-P<sub>4</sub> in THF (Table 1, entry 10;  $T_d$  defined as the temperature for 5% weight loss; polymer sample was heated from ambient temperature to 500 °C at a rate of 10 °C min<sup>-1</sup>).
